# Supplementary material for: Differential transcript isoform usage pre- and post-zygotic genome activation in zebrafish
Source: PubMed Central journal article supplement (PMC3747860; doi:10.1186/1471-2164-14-331), 2013-05-15

Legends for figures in Additional file 1

### **Figure S1**

Mapping of reads. Two different short-read aligner programs were used to map RNA-seq reads onto the zebrafish genome at pre- and post-MBT stages of development (representing pre- and post-ZGA transcriptomes). These two aligners map more reads when combined than when used individually.

### **Figure S2**

IGV screenshot. TopHat and Bioscope complement each other; some reads were only mapped by TopHat, others only by Bioscope. Using both results in better coverage and improvement of the accuracy of the assembled isoforms. The arrows indicate Tophat (grey arrow) and Bioscope (white arrow) specific reads. In 'both' reads mapped by the two aligners are merged. The visualized area is on chromosome 1:396600-402000.

### **Figure S3**

*dazl* isoform expression. *dazl* has two isoforms expressed maternally which exhibit differential degradation kinetics; isoform 2 is degraded more rapidly than isoform 1 and becomes the minor isoform after the 256-cell stage.

### **Figure S4**

H3K4me3 marking of TSSs post-ZGA. **(a)** H3K4me3 post-translational modification marks (black bar) multiple alternative *dazl* TSSs (black arrows) at the post-ZGA stage. **(b)** Different

*Sall4* TSSs are used pre-ZGA and post-ZGA. The maternal RNAs were transcribed from a TSS (black arrow) different from the zygotic transcripts (grey arrow). The H3K4me3 marks both TSSs (black bar). (c) *Actl6a* is transcribed from different promoters. Maternal isoform (black arrow) and post-ZGA (grey arrow). Only the post-ZGA TSS is marked by K3K4me3 (black bar).

### Figure S5

qPCR validation of *f11r*. qPCR results for *f11r* confirms the onset of expression of the isoform with exon 8 skipped at 5.5 hpf (red asterix).

### Figure S6

Novel isoforms of *dnmt1*. Numerous novel isoforms for *dnmt1* were detected; several were produced due to skipping of multiple exons.

### Figure S7

Novel isoforms of *pou5f1*. We detected several new AS events which led to the assembly of four isoforms (grey arrow) different from the annotated version. We also observed a longer 3' UTR than in the annotated version (black arrow), in particular at the post-ZGA stage (white arrow).

### Figure S8

Metagene of skipped exons calculated from RNA-seq reads. Red line = skipped exons. Blue line = random set of exons.

### Figure S9

qPCR validation of *magil* expression.

*magil* expresses a post-ZGA specific isoform (red asterisk).

# S1

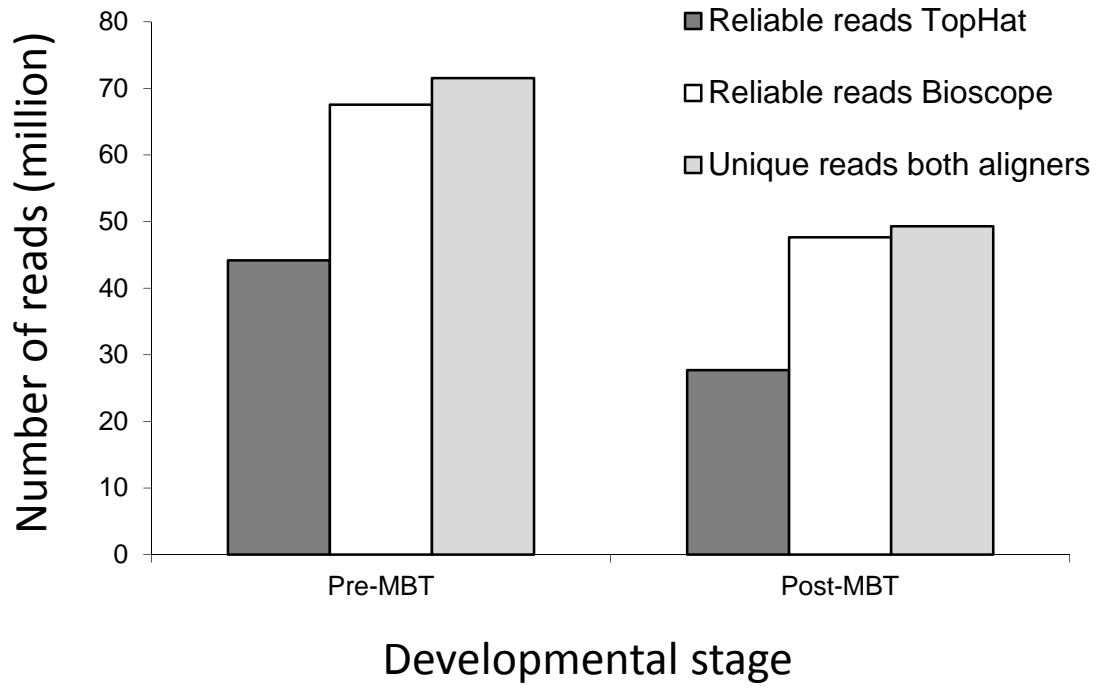

# S2

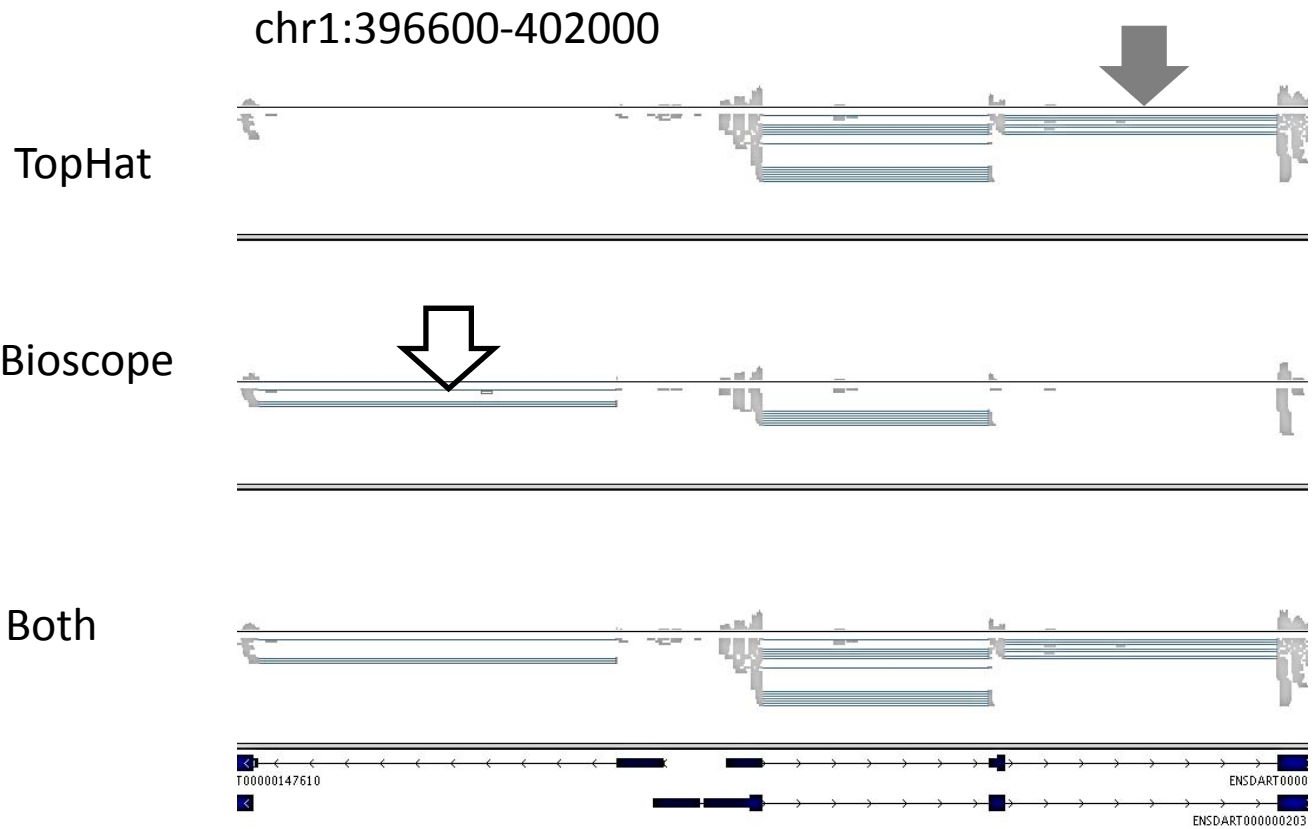

S3

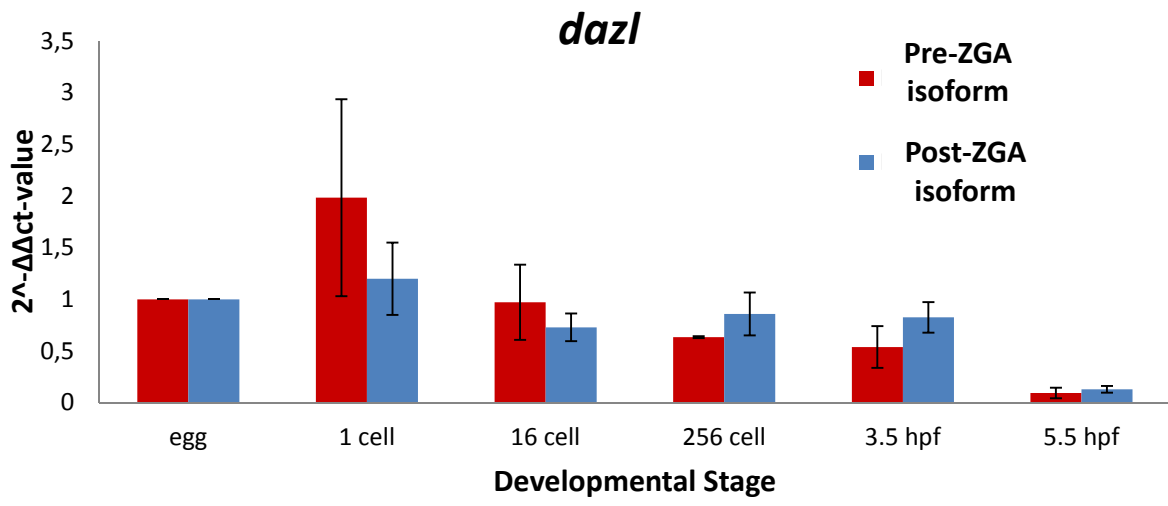

# S4

(a)

*dazl*

H3K4me3  
peaks

Post-ZGA  
reads

Pre-ZGA  
reads

Ensembl  
Annotation

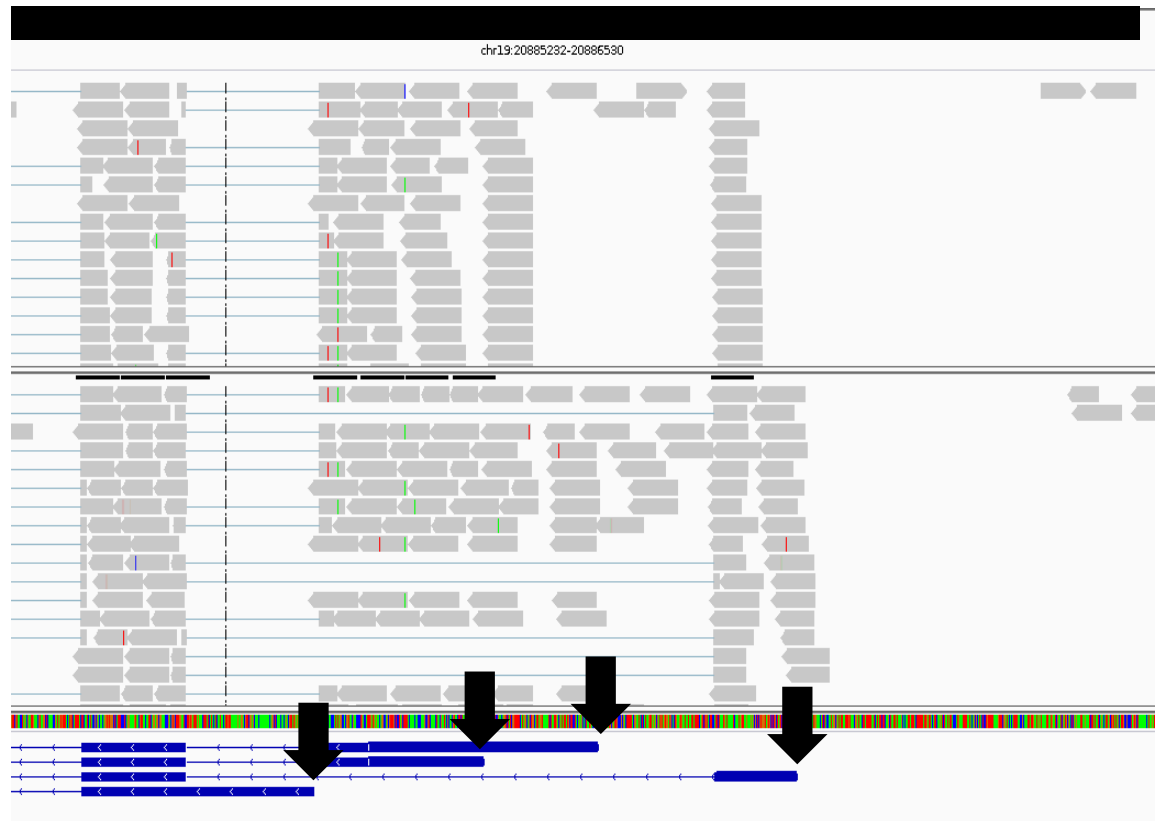

(b)

*sall4*

Pre-ZGA  
reads

H3K4me3  
peaks

Post-ZGA  
reads

Assembled  
transcripts

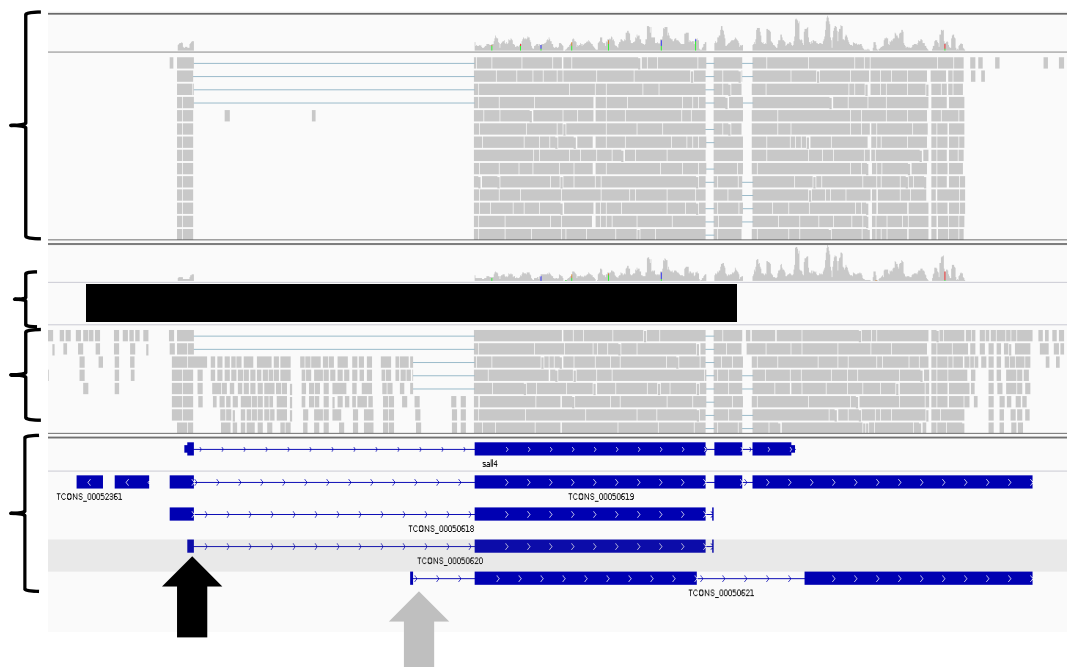

# S4

(c)

*act16a*

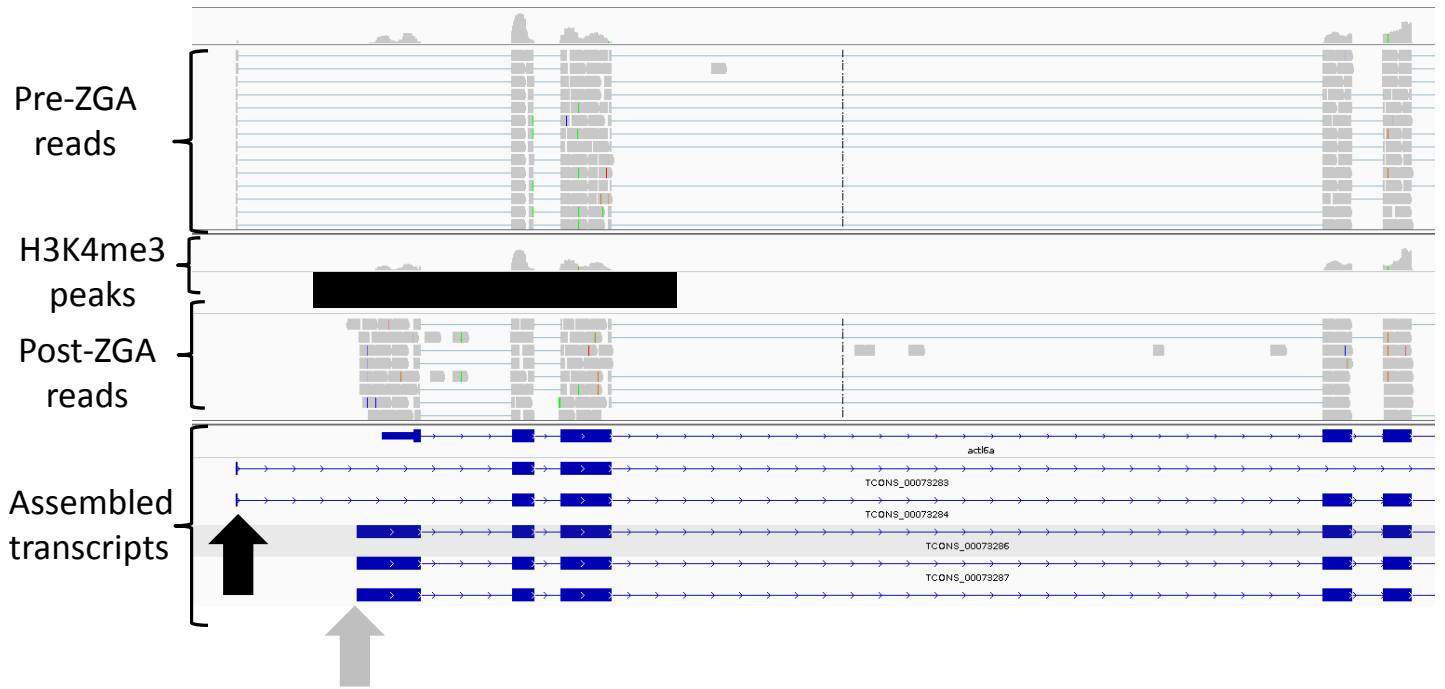

# S5

*f11r*

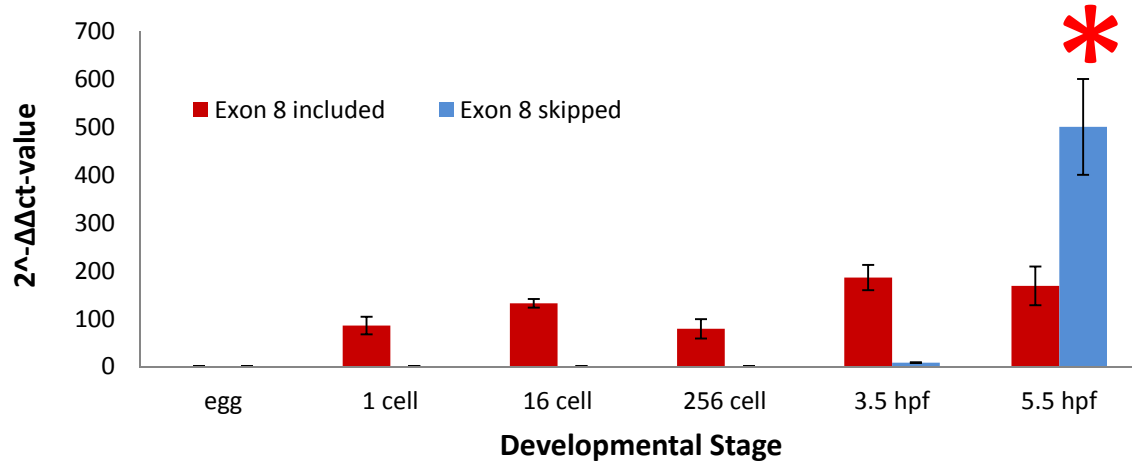



**S6**

*dnmt1*

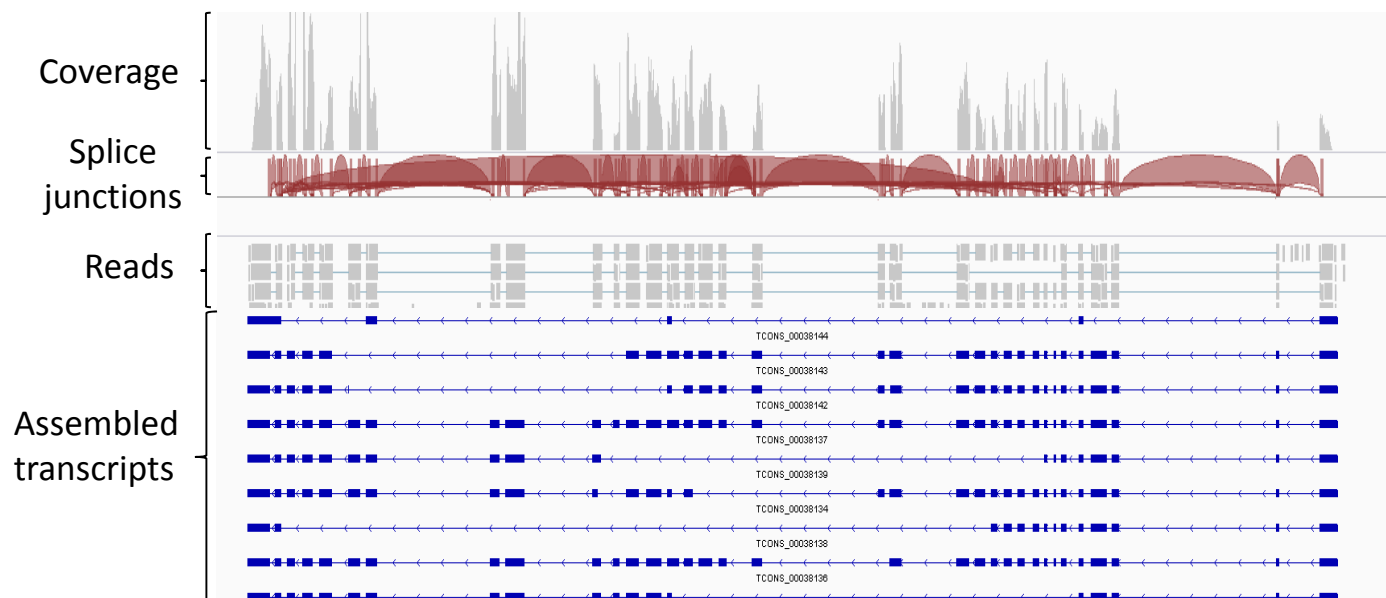

**S7**

*pou5f1*

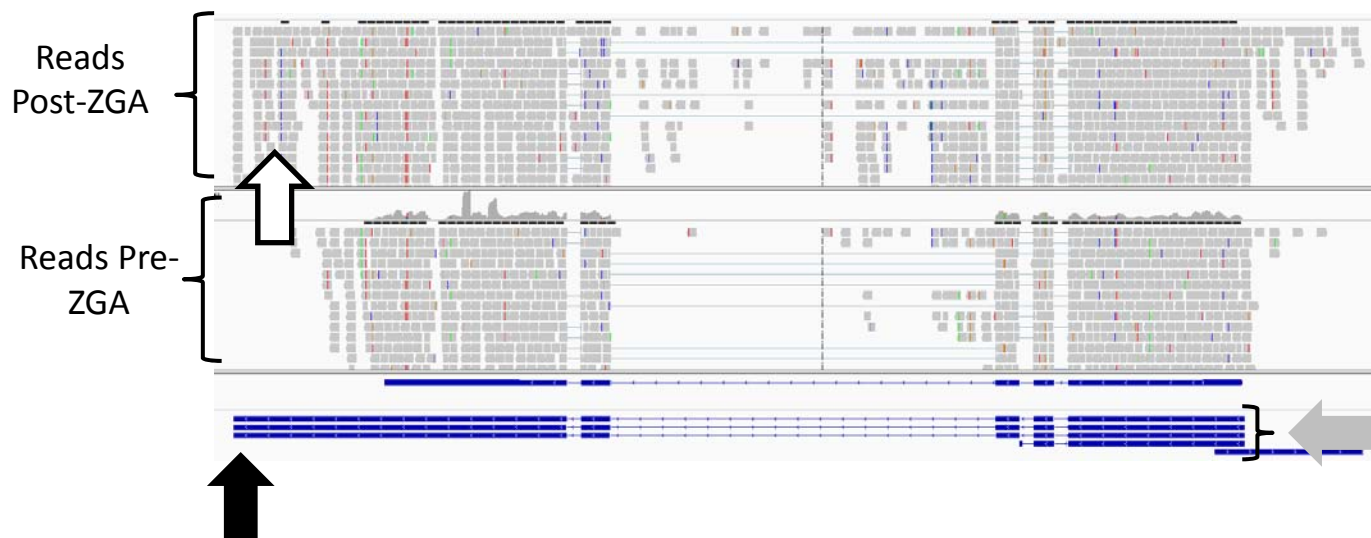

S8

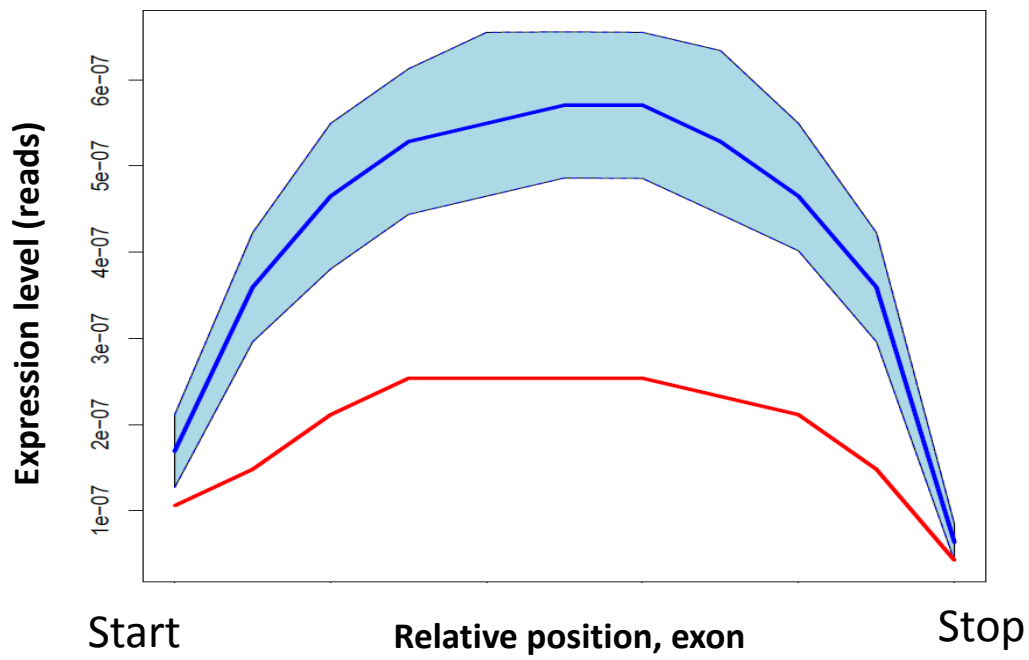

S9

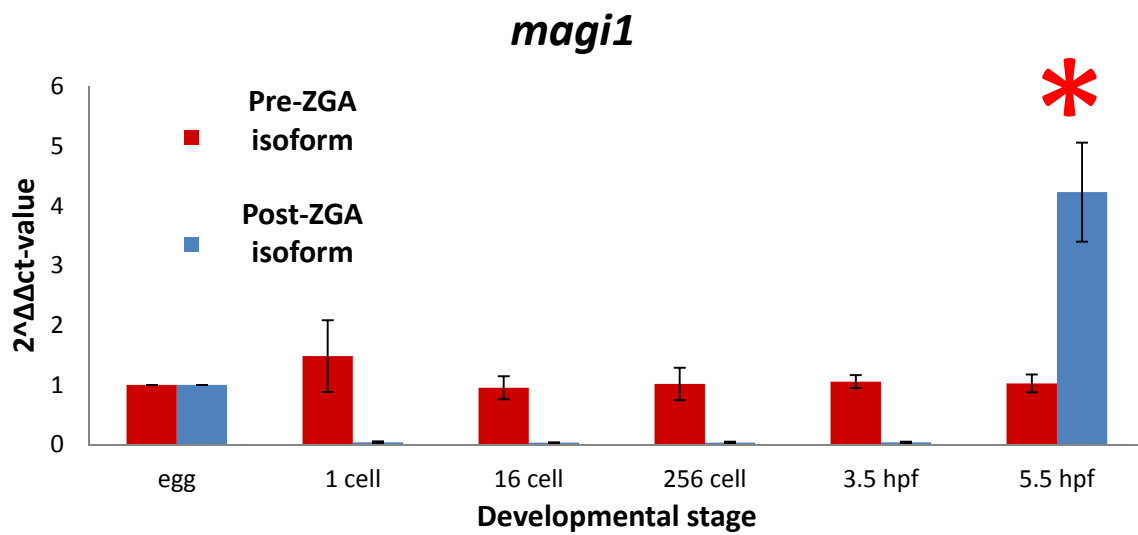

Supplement: 1471-2164-14-331-S1.pdf [file 1471-2164-14-331-S1.pdf]
